# Supplementary material for: Glycosylation of Zika Virus is Important in Host–Virus Interaction and Pathogenic Potential
Source: PubMed Central journal article supplement (PMC6829355; doi:10.3390/ijms20205206), 2019-10-21
Supplement: ijms-20-05206-s001.pdf [file ijms-20-05206-s001.pdf]

## Supplementary Information

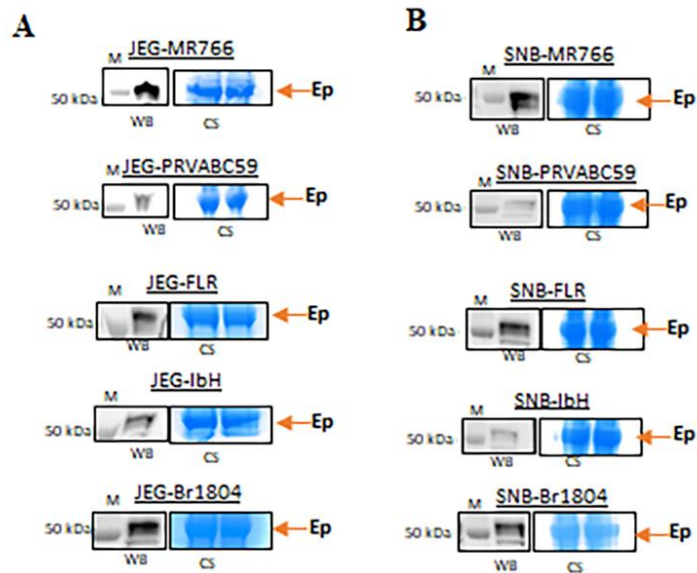

**Figure S1.** SDS-PAGE and Western blotting analysis of purified Zika virions. Asian strains (PRVABC59 and FLR), African strains (MR766 and IbH), and the primary isolate (SIRP-HB-2016-1840) produced from (A) JEG-3 cells and (B) SNB-19 cells and stained using mass spectrometry compatible Coomassie (CS) dye after resolving on SDS-PAGE. The Zika virus envelope proteins (Ep) were excised from the band for N-linked glycan analysis. Western blotting (WB) was performed to confirm the envelope proteins of ZIKV virions using Zika virus envelope protein antibody.

**Table S1.** N-glycans of envelope (E) protein of mature ZIKV identified by MALDI-ToF. Predicted N-linked glycan structures and their molecular ions in MALDI spectra of envelope (E) protein obtained from purified mature ZIKV virions produced from cell lines of different origin.

| Mass (m/z) |        | Composition     | Proposed Structure |
|------------|--------|-----------------|--------------------|
| Th.        | Obs.   |                 |                    |
| 1579.9     | 1579.9 | Hex5HexNAc2     |                    |
| 1620.9     | 1620.9 | Hex4HexNAc3     |                    |
| 1661.9     | 1662.0 | Hex3HexNAc4     |                    |
| 1784.0     | 1784.0 | Hex6HexNAc2     |                    |
| 1825.0     | 1825.0 | Hex5HexNAc3     |                    |
| 1836.0     | 1836.1 | Hex3HexNAc4Fuc1 |                    |
| 1866.1     | 1866.1 | Hex4HexNAc4     |                    |

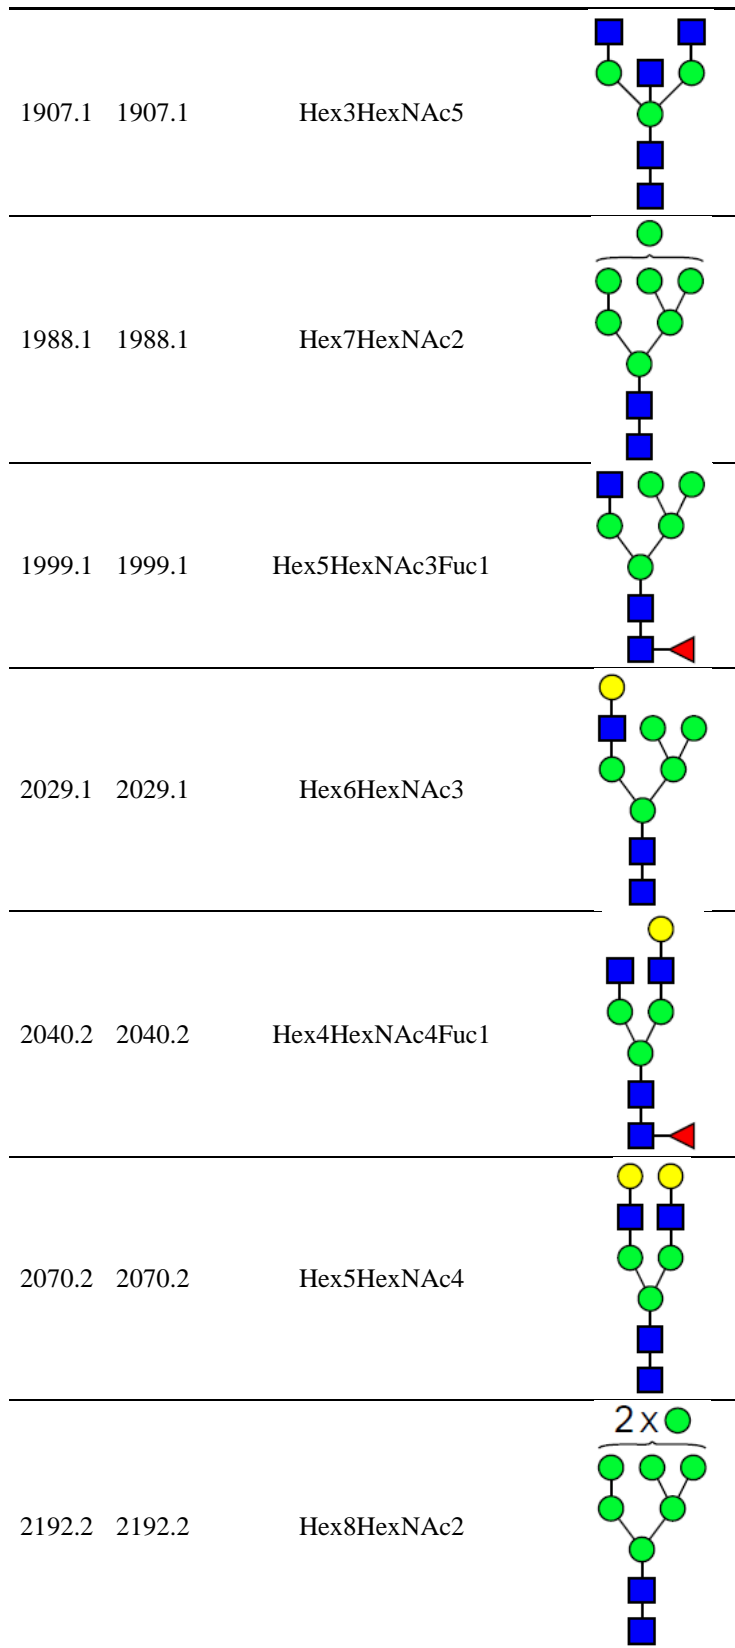

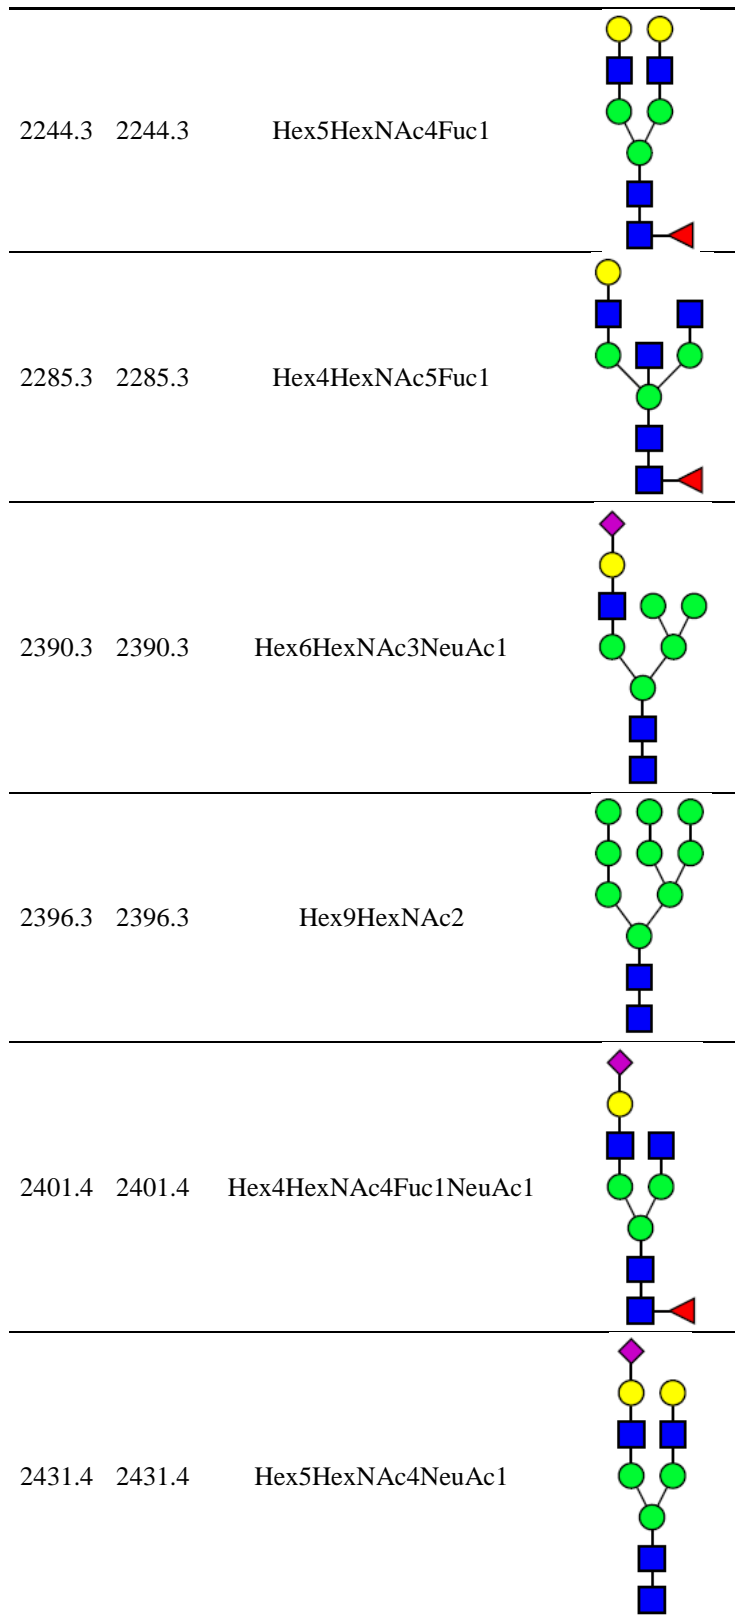

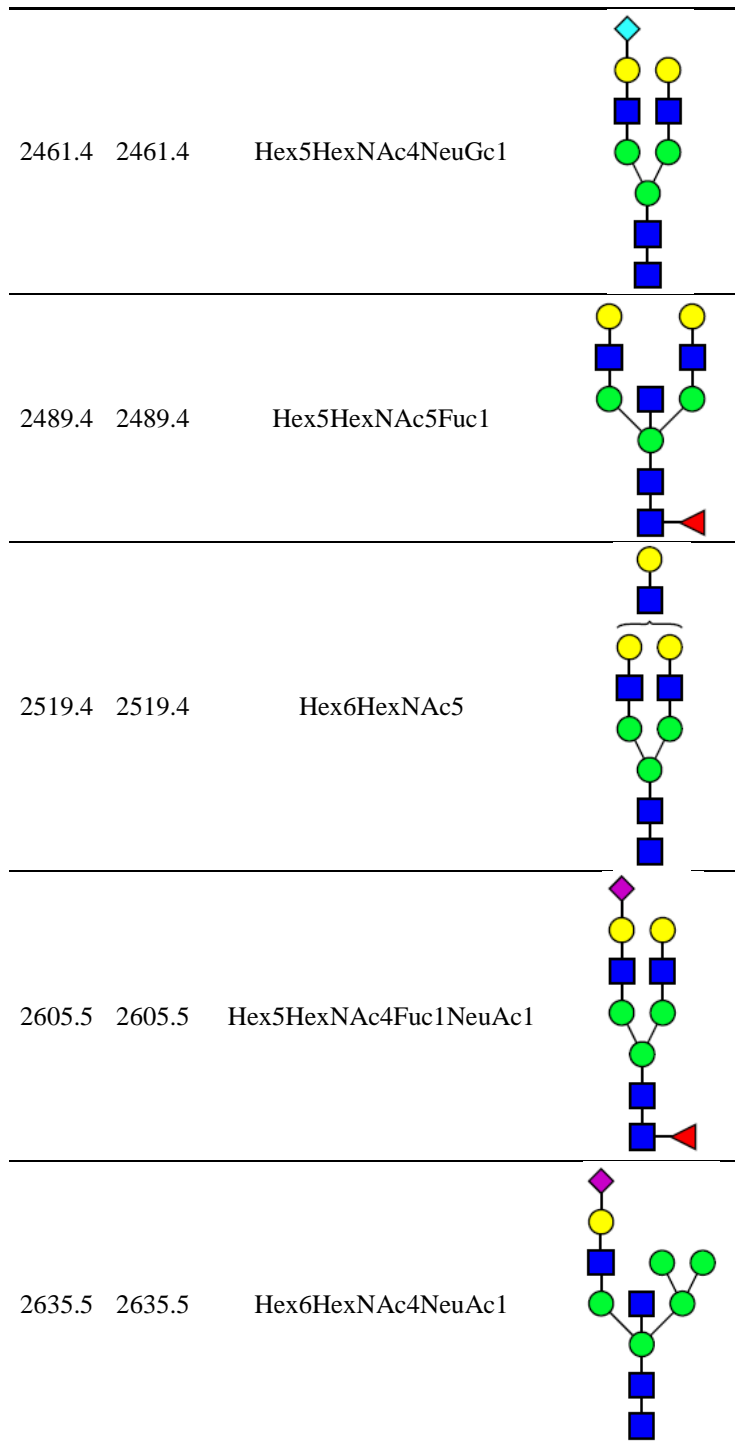

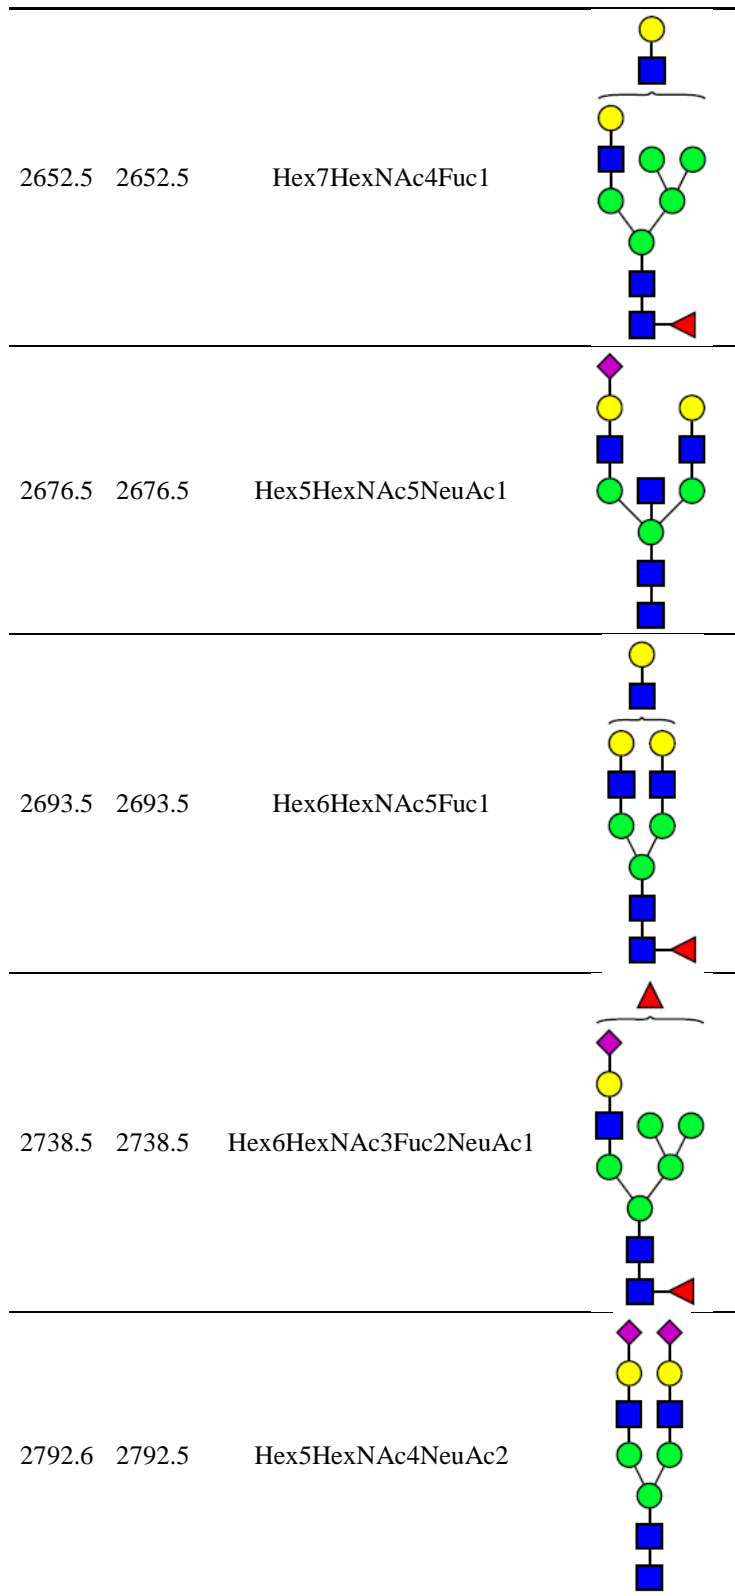

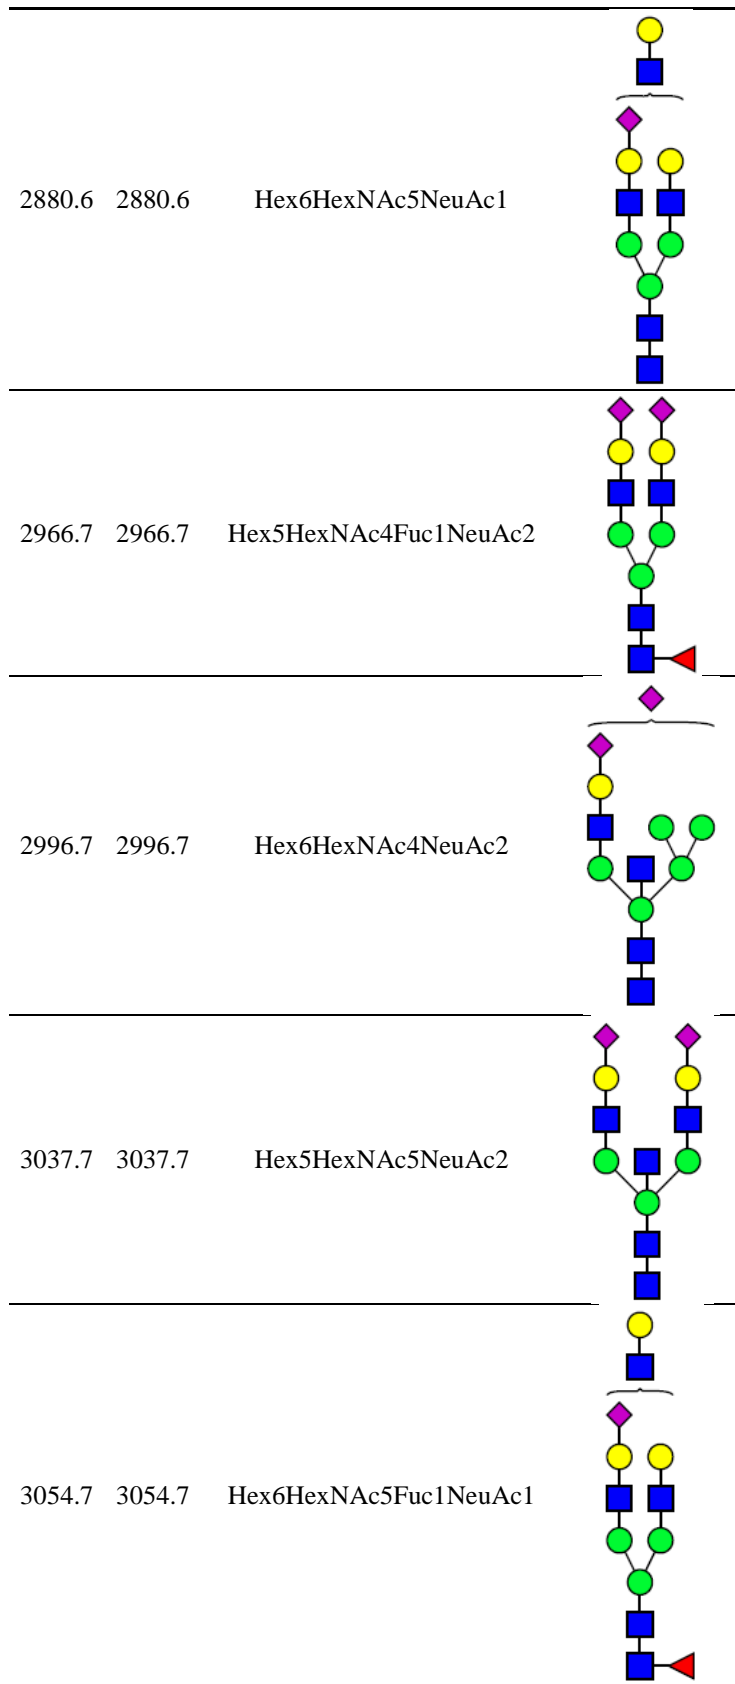

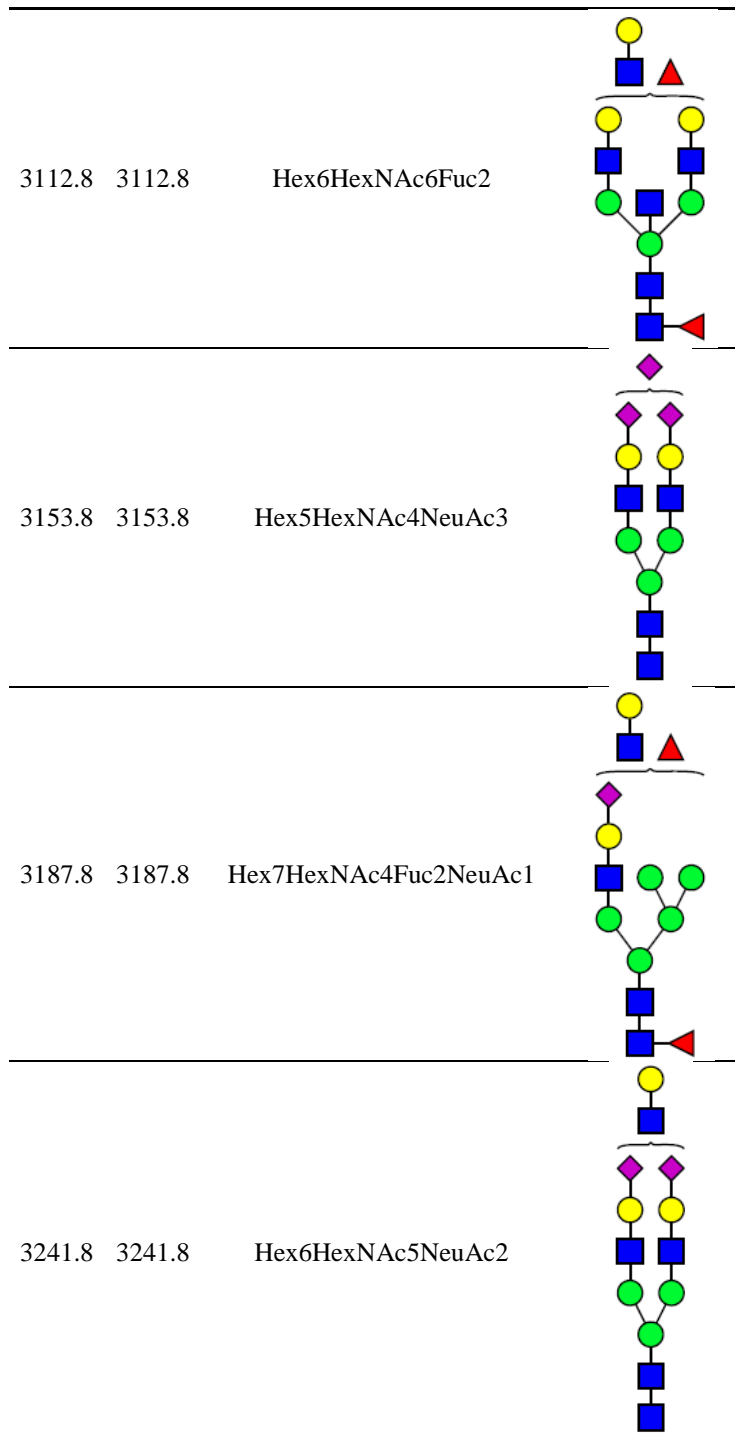



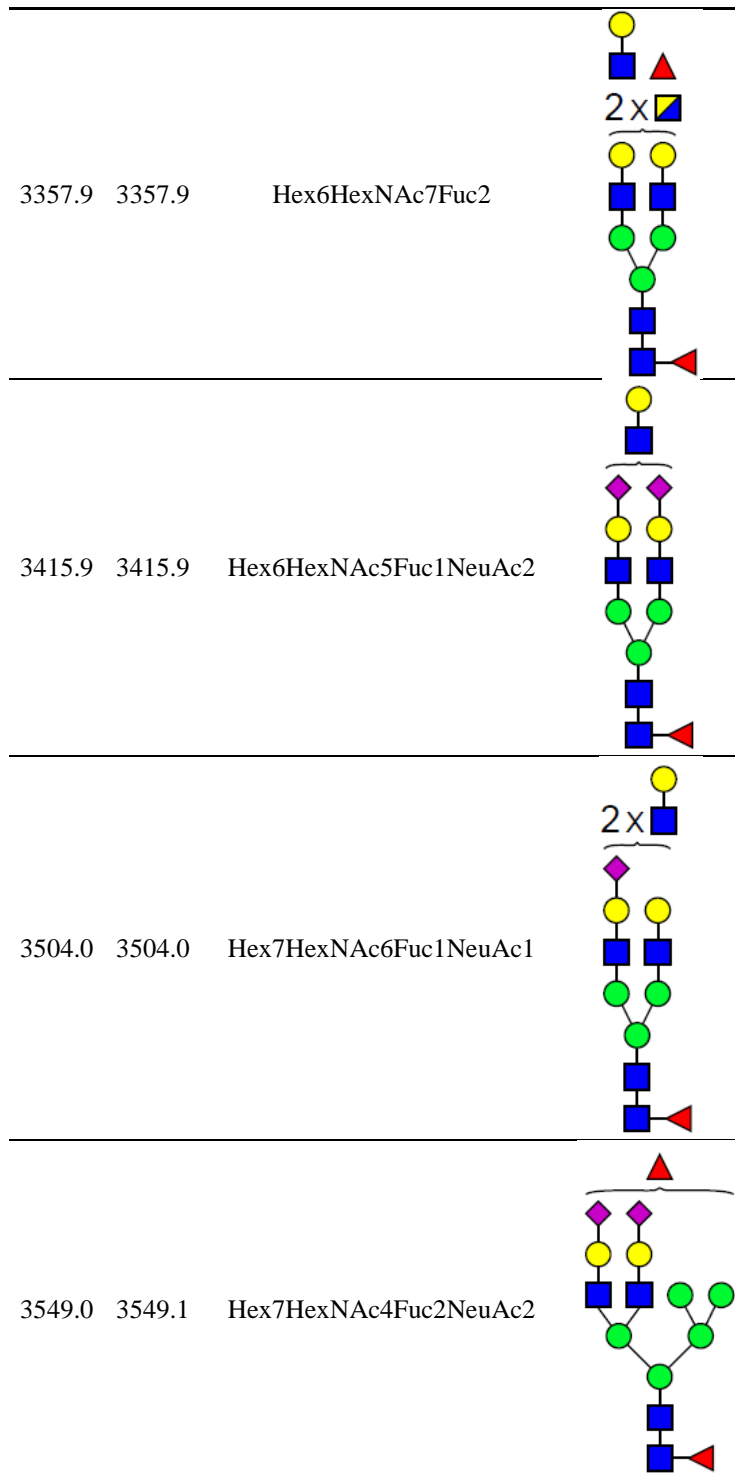

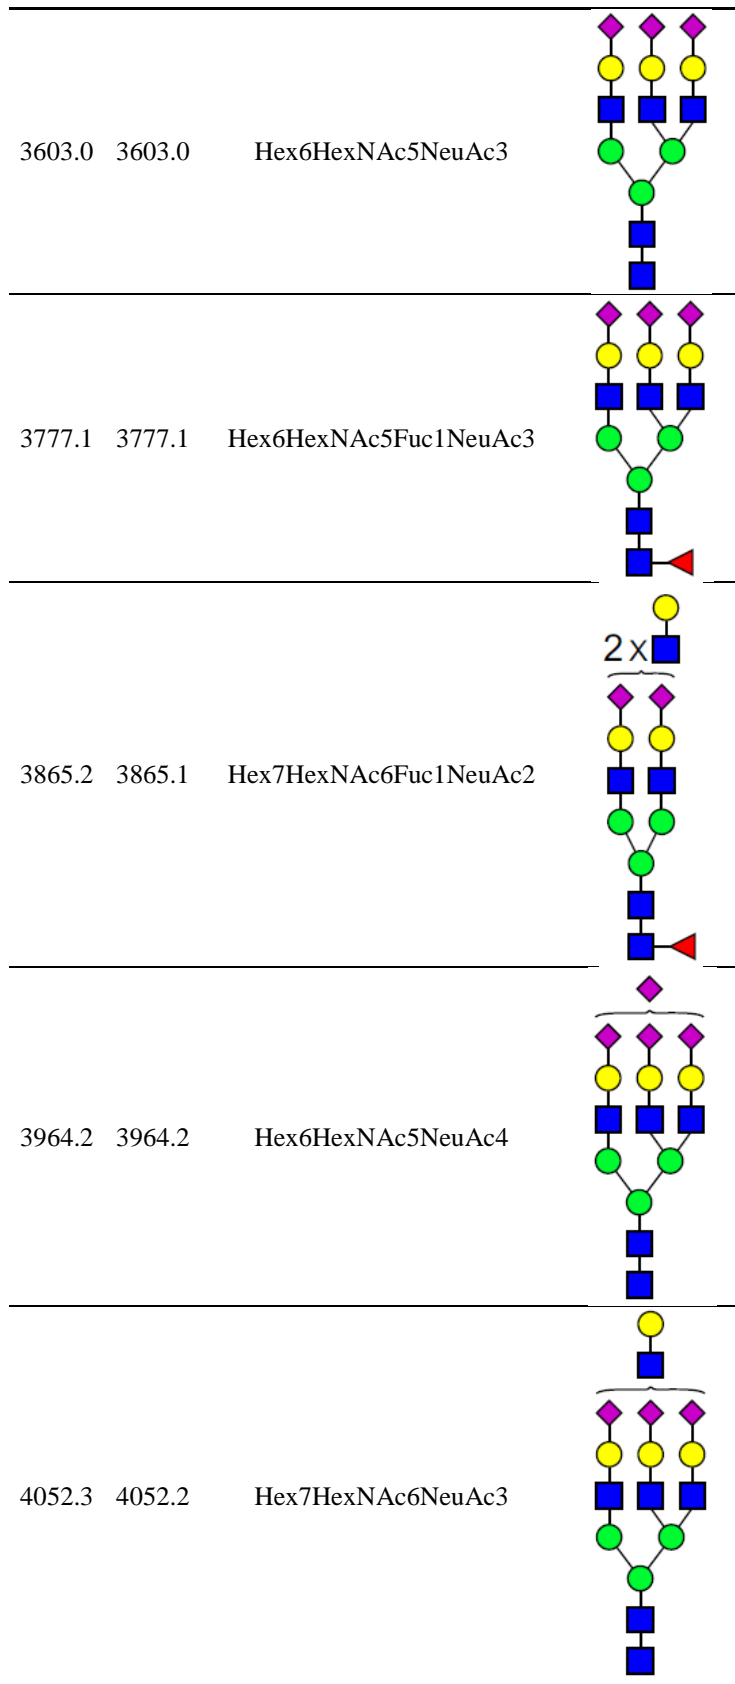

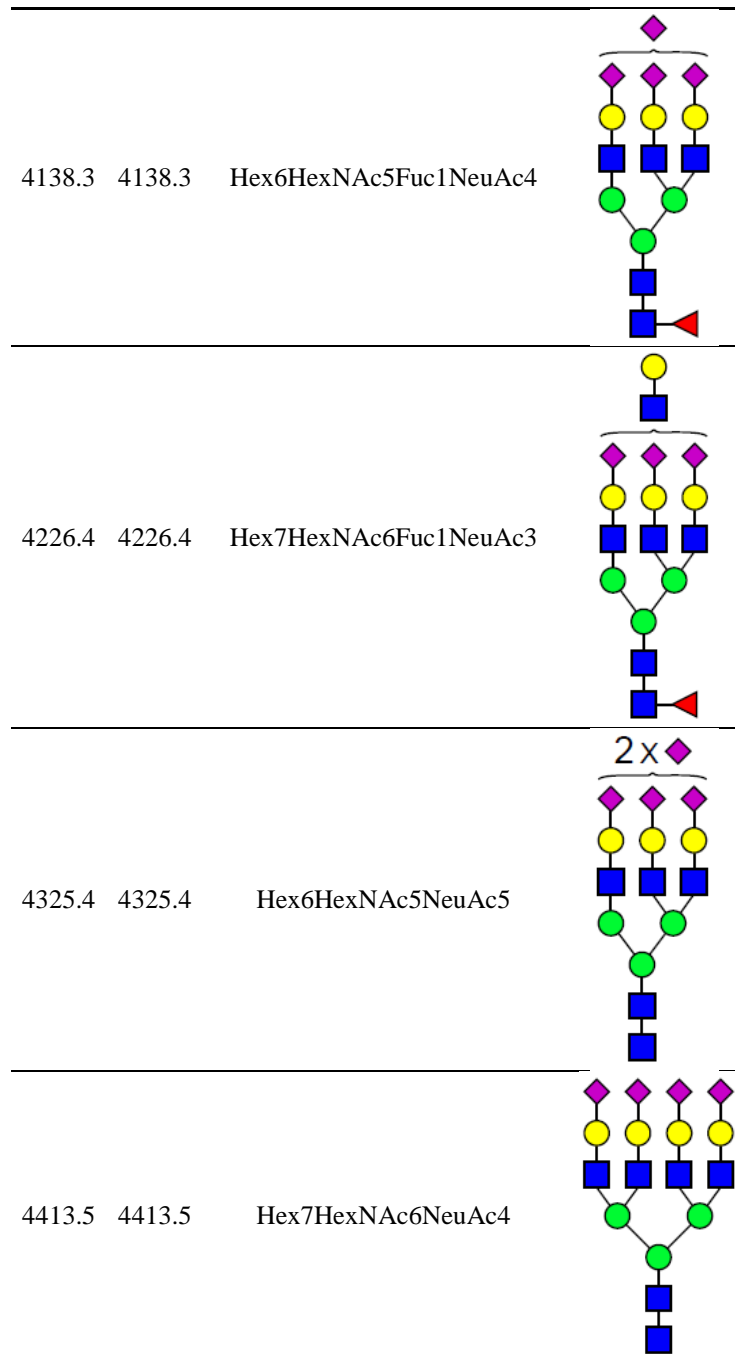

**Table S2.** N-glycans of envelope (E) protein of mature ZIKV identified by lectin microarray. Predicted N-linked glycan molecular ions of envelope (E) protein obtained from purified mature ZIKV virions produced from cell lines of different origin based on their binding specificities in lectin microarray.

| m/z (ZVEG-E) | Lectin (cell surface) | Spearman r | p-Value | N  |
|--------------|-----------------------|------------|---------|----|
| 1620.9       | UEA_I                 | -0.615*    | 0.025   | 13 |
|              | ECA                   | -0.698**   | 0.008   | 13 |
|              | TxLC_I                | -0.578*    | 0.039   | 13 |
|              | PWM                   | -0.698**   | 0.008   | 13 |

|             |         |          |       |    |
|-------------|---------|----------|-------|----|
|             | ACA     | 0.687**  | 0.010 | 13 |
|             | MPA     | 0.593*   | 0.033 | 13 |
| 1662.0      | SNA     | -0.648*  | 0.043 | 10 |
|             | GNA     | 0.648*   | 0.043 | 10 |
|             | ACG     | -0.661*  | 0.038 | 10 |
|             | ACA     | 0.697*   | 0.025 | 10 |
| 1784.0      | AOL     | -0.560*  | 0.046 | 13 |
|             | UEA_I   | -0.608*  | 0.036 | 12 |
|             | AOL     | -0.727** | 0.007 | 12 |
|             | AAL     | -0.678*  | 0.015 | 12 |
| 1825.0      | MAL_I   | -0.636*  | 0.026 | 12 |
|             | TxLC_I  | -0.581*  | 0.047 | 12 |
|             | BPL     | 0.608*   | 0.036 | 12 |
|             | ACA     | 0.678*   | 0.015 | 12 |
|             | MPA     | 0.657*   | 0.020 | 12 |
|             | MAL_I   | -0.648*  | 0.043 | 10 |
|             | SNA     | -0.758*  | 0.011 | 10 |
|             | PHAL    | -0.851** | 0.002 | 10 |
| 1836.1      | ConA    | 0.842**  | 0.002 | 10 |
|             | GNA     | 0.770**  | 0.009 | 10 |
|             | HHL     | 0.733*   | 0.016 | 10 |
|             | TJA_II  | 0.673*   | 0.033 | 10 |
|             | UDA     | 0.879**  | 0.001 | 10 |
| 1907.1      | TJA_II  | 0.685*   | 0.014 | 12 |
|             | PNA     | 0.699*   | 0.011 | 12 |
|             | PSA     | 0.650*   | 0.042 | 10 |
|             | LCA     | 0.663*   | 0.037 | 10 |
|             | MAL_I   | -0.657*  | 0.039 | 10 |
| 1999.1      | ACG     | -0.748*  | 0.013 | 10 |
|             | ACA     | 0.705*   | 0.023 | 10 |
|             | SBA     | 0.671*   | 0.034 | 10 |
|             | Calsepa | 0.754*   | 0.012 | 10 |
|             | WGA     | -0.675*  | 0.032 | 10 |
|             | AOL     | -0.741** | 0.006 | 12 |
| 2029.155244 | AAL     | -0.678*  | 0.015 | 12 |
|             | PNA     | 0.615*   | 0.033 | 12 |
|             | ACA     | 0.615*   | 0.033 | 12 |
|             | MPA     | 0.622*   | 0.031 | 12 |
| 2070.184523 | DSA     | 0.488*   | 0.034 | 19 |
|             | PWM     | -0.488*  | 0.034 | 19 |
|             | VVA     | -0.474*  | 0.041 | 19 |
| 2192.2      | AOL     | -0.599*  | 0.031 | 13 |
|             | DSA     | 0.486*   | 0.030 | 20 |
| 2244.282958 | VVA     | -0.553*  | 0.011 | 20 |
|             | WGA     | 0.490*   | 0.028 | 20 |
| 2285.3      | MAL_I   | -0.618*  | 0.043 | 11 |

|             |          |          |       |    |
|-------------|----------|----------|-------|----|
|             | PSA      | -0.575*  | 0.013 | 18 |
|             | LCA      | -0.505*  | 0.033 | 18 |
|             | AOL      | 0.488*   | 0.040 | 18 |
|             | AAL      | 0.494*   | 0.037 | 18 |
|             | MAL_I    | 0.647**  | 0.004 | 18 |
|             | SNA      | 0.649**  | 0.004 | 18 |
|             | SSA      | 0.560*   | 0.016 | 18 |
|             | PHAL     | 0.508*   | 0.031 | 18 |
|             | RCA120   | 0.606**  | 0.008 | 18 |
|             | PHAE     | 0.655**  | 0.003 | 18 |
|             | DSA      | 0.779**  | 0.000 | 18 |
|             | NPA      | -0.487*  | 0.040 | 18 |
| 2431.372544 | ConA     | -0.573*  | 0.013 | 18 |
|             | GNA      | -0.759** | 0.000 | 18 |
|             | HHL      | -0.767** | 0.000 | 18 |
|             | BPL      | -0.511*  | 0.030 | 18 |
|             | TJA_II   | -0.612** | 0.007 | 18 |
|             | ABA      | -0.571*  | 0.013 | 18 |
|             | UDA      | -0.589*  | 0.010 | 18 |
|             | PNA      | -0.587*  | 0.010 | 18 |
|             | ACA      | -0.641** | 0.004 | 18 |
|             | MPA      | -0.505*  | 0.033 | 18 |
|             | VVA      | -0.630** | 0.005 | 18 |
|             | Calsepa  | -0.496*  | 0.036 | 18 |
|             | WGA      | 0.647**  | 0.004 | 18 |
|             | GSL_I_A4 | -0.517*  | 0.028 | 18 |
|             | PSA      | -0.718** | 0.002 | 16 |
|             | LCA      | -0.618*  | 0.011 | 16 |
|             | UEA_I    | 0.789**  | 0.000 | 16 |
|             | AOL      | 0.738**  | 0.001 | 16 |
|             | AAL      | 0.721**  | 0.002 | 16 |
|             | MAL_I    | 0.638**  | 0.008 | 16 |
|             | ECA      | 0.550*   | 0.027 | 16 |
|             | PHAE     | 0.588*   | 0.017 | 16 |
|             | DSA      | 0.571*   | 0.021 | 16 |
| 2605.468092 | GSL_II   | 0.557*   | 0.025 | 16 |
|             | NPA      | -0.628** | 0.009 | 16 |
|             | GNA      | -0.512*  | 0.043 | 16 |
|             | HHL      | -0.509*  | 0.044 | 16 |
|             | ACG      | 0.529*   | 0.035 | 16 |
|             | TxLC_I   | 0.698**  | 0.003 | 16 |
|             | BPL      | -0.653** | 0.006 | 16 |
|             | TJA_II   | -0.506*  | 0.046 | 16 |
|             | ABA      | -0.894** | 0.000 | 16 |
|             | Jacalin  | -0.653** | 0.006 | 16 |
|             | PNA      | -0.568*  | 0.022 | 16 |

|             |          |          |       |    |
|-------------|----------|----------|-------|----|
|             | WFA      | 0.690**  | 0.003 | 16 |
|             | ACA      | -0.897** | 0.000 | 16 |
|             | MPA      | -0.853** | 0.000 | 16 |
|             | VVA      | -0.604*  | 0.013 | 16 |
|             | Calsepa  | -0.741** | 0.001 | 16 |
|             | MAH      | 0.738**  | 0.001 | 16 |
|             | WGA      | 0.800**  | 0.000 | 16 |
|             | GSL_I_A4 | -0.510*  | 0.043 | 16 |
| 2635.482067 | PHAL     | 0.589*   | 0.034 | 13 |
|             | RCA120   | 0.553*   | 0.050 | 13 |
|             | NPA      | -0.572*  | 0.041 | 13 |
|             | PSA      | -0.842** | 0.002 | 10 |
|             | UEA_I    | 0.721*   | 0.019 | 10 |
|             | AOL      | 0.661*   | 0.038 | 10 |
|             | TxLC_I   | 0.815**  | 0.004 | 10 |
|             | BPL      | -0.685*  | 0.029 | 10 |
| 2693.522874 | EEL      | 0.646*   | 0.043 | 10 |
|             | ABA      | -0.794** | 0.006 | 10 |
|             | PWM      | 0.927**  | 0.000 | 10 |
|             | ACA      | -0.733*  | 0.016 | 10 |
|             | MPA      | -0.806** | 0.005 | 10 |
|             | MAH      | 0.640*   | 0.046 | 10 |
|             | WGA      | 0.721*   | 0.019 | 10 |
| 2966.7      | UEA_I    | 0.852**  | 0.001 | 11 |
|             | AOL      | 0.836**  | 0.001 | 11 |
|             | AAL      | 0.827**  | 0.002 | 11 |
|             | TxLC_I   | 0.793**  | 0.004 | 11 |
|             | BPL      | -0.673*  | 0.023 | 11 |
|             | ABA      | -0.818** | 0.002 | 11 |
| 2996.674682 | PWM      | 0.682*   | 0.021 | 11 |
|             | WFA      | 0.825**  | 0.002 | 11 |
|             | ACA      | -0.682*  | 0.021 | 11 |
|             | MPA      | -0.818** | 0.002 | 11 |
|             | MAH      | 0.703*   | 0.016 | 11 |
|             | WGA      | 0.673*   | 0.023 | 11 |
|             | STL      | -0.770*  | 0.015 | 9  |
|             | LTL      | 0.557*   | 0.031 | 15 |
|             | AOL      | -0.661** | 0.007 | 15 |
|             | AAL      | -0.693** | 0.004 | 15 |
|             | MAL_I    | -0.557*  | 0.031 | 15 |
| 3037.687563 | DSA      | -0.614*  | 0.015 | 15 |
|             | GNA      | 0.543*   | 0.037 | 15 |
|             | HHL      | 0.550*   | 0.034 | 15 |
|             | BPL      | 0.671**  | 0.006 | 15 |
|             | TJA_II   | 0.607*   | 0.016 | 15 |
|             | PNA      | 0.554*   | 0.032 | 15 |

|             |        |          |       |    |
|-------------|--------|----------|-------|----|
|             | ACA    | 0.543*   | 0.037 | 15 |
|             | PTL_I  | 0.517*   | 0.048 | 15 |
|             | WGA    | -0.671** | 0.006 | 15 |
|             | UEA_I  | 0.768**  | 0.001 | 14 |
|             | AOL    | 0.701**  | 0.005 | 14 |
|             | AAL    | 0.679**  | 0.008 | 14 |
|             | TxLC_I | 0.755**  | 0.002 | 14 |
| 3054.708381 | BPL    | -0.657*  | 0.011 | 14 |
|             | ABA    | -0.675** | 0.008 | 14 |
|             | ACA    | -0.688** | 0.007 | 14 |
|             | MPA    | -0.749** | 0.002 | 14 |
|             | MAH    | 0.652*   | 0.012 | 14 |
|             | WGA    | 0.631*   | 0.016 | 14 |
|             | TJA_I  | -0.723*  | 0.018 | 10 |
|             | NPA    | 0.784**  | 0.007 | 10 |
| 3357.870189 | ACG    | -0.675*  | 0.032 | 10 |
|             | HPA    | 0.685*   | 0.029 | 10 |
|             | VVA    | 0.793**  | 0.006 | 10 |
|             | UEA_I  | 0.626*   | 0.022 | 13 |
|             | AOL    | 0.736**  | 0.004 | 13 |
|             | AAL    | 0.742**  | 0.004 | 13 |
|             | BPL    | -0.758** | 0.003 | 13 |
| 3415.91826  | ABA    | -0.621*  | 0.024 | 13 |
|             | LEL    | 0.582*   | 0.037 | 13 |
|             | ACA    | -0.610*  | 0.027 | 13 |
|             | MPA    | -0.643*  | 0.018 | 13 |
|             | WGA    | 0.621*   | 0.024 | 13 |
|             | DSA    | -0.502*  | 0.029 | 19 |
| 3603.00794  | EEL    | 0.456*   | 0.050 | 19 |
|             | VVA    | 0.577**  | 0.010 | 19 |
|             | LTL    | 0.619*   | 0.024 | 13 |
|             | UEA_I  | 0.738**  | 0.004 | 13 |
|             | AOL    | 0.726**  | 0.005 | 13 |
|             | AAL    | 0.685**  | 0.010 | 13 |
|             | TxLC_I | 0.680*   | 0.011 | 13 |
| 3777.1      | BPL    | -0.630*  | 0.021 | 13 |
|             | ABA    | -0.669*  | 0.012 | 13 |
|             | LEL    | 0.580*   | 0.038 | 13 |
|             | PWM    | 0.710**  | 0.007 | 13 |
|             | MPA    | -0.710** | 0.007 | 13 |
|             | MAH    | 0.629*   | 0.021 | 13 |
|             | ECA    | -0.900*  | 0.037 | 5  |
| 3865.144605 | STL    | 0.975**  | 0.005 | 5  |
|             | ACA    | 0.900*   | 0.037 | 5  |
|             | MAL_I  | -0.574*  | 0.016 | 17 |
| 3964.2      | SNA    | -0.529*  | 0.029 | 17 |

|             |        |          |       |    |
|-------------|--------|----------|-------|----|
|             | RCA120 | -0.493*  | 0.045 | 17 |
|             | PHAE   | -0.515*  | 0.035 | 17 |
|             | DSA    | -0.733** | 0.001 | 17 |
|             | ConA   | 0.615**  | 0.009 | 17 |
|             | GNA    | 0.708**  | 0.001 | 17 |
|             | HHL    | 0.725**  | 0.001 | 17 |
|             | BPL    | 0.505*   | 0.039 | 17 |
|             | TJA_II | 0.625**  | 0.007 | 17 |
|             | PNA    | 0.588*   | 0.013 | 17 |
|             | ACA    | 0.596*   | 0.012 | 17 |
|             | VVA    | 0.620**  | 0.008 | 17 |
|             | WGA    | -0.527*  | 0.030 | 17 |
|             | UEA_I  | 0.546*   | 0.029 | 16 |
| 4052.3      | AOL    | 0.659**  | 0.005 | 16 |
|             | AAL    | 0.558*   | 0.025 | 16 |
|             | MPA    | -0.508*  | 0.045 | 16 |
| 4325.5      | SNA    | 0.900*   | 0.037 | 5  |
| 4413.518836 | DSA    | -0.515*  | 0.050 | 15 |
|             | HHL    | 0.520*   | 0.047 | 15 |

**Table S3.** Lectins used for 45 lectin microarray, and their names and glycan binding specificities. A list of lectins, binding specificities, origin, and abbreviations of 45 lectins on the Lectin chip examined in this study is shown. Abbreviations: Gal (D-galactose), GalNAc (N-acetyl-galactosamine), GlcNAc (N-acetyl-glucosamine), Fuc (L-fucose), Glc (D-glucose), Sia (Sialic acid), LacNAc (N-acetyl-lactosamine). Specificity data were obtained by frontal affinity chromatography and glycoconjugate microarray.

|    | Name   | Species                        | Origin      | Glycan specificity <sup>2</sup>                                                                                     |
|----|--------|--------------------------------|-------------|---------------------------------------------------------------------------------------------------------------------|
| 1  | LTL    | <i>Lotus tetragonolobus</i>    | Natural     | Fuc (Le <sup>x</sup> , Le <sup>y</sup> )                                                                            |
| 2  | PSA    | <i>Pisum sativum</i>           | Natural     | $\alpha$ 1-6Fuc up to biantenna                                                                                     |
| 3  | LCA    | <i>Lens culinaris</i>          | Natural     | $\alpha$ 1-6Fuc up to biantenna                                                                                     |
| 4  | UEAI   | <i>Ulex europaeus</i>          | Natural     | $\alpha$ 1-2Fuc                                                                                                     |
| 5  | AOL    | <i>Aspergillus oryzae</i>      | Recombinant | $\alpha$ 1-6Fuc (Core), $\alpha$ 1-2Fuc (H), $\alpha$ 1-3Fuc (Le <sup>x</sup> ), $\alpha$ 1-3Fuc (Le <sup>y</sup> ) |
| 6  | AAL    | <i>Aleuria aurantia</i>        | Natural     | $\alpha$ 1-6Fuc (Core), $\alpha$ 1-2Fuc (H), $\alpha$ 1-3Fuc (Le <sup>x</sup> ), $\alpha$ 1-3Fuc (Le <sup>y</sup> ) |
| 7  | MAL    | <i>Maackia amurensis</i>       | Natural     | $\alpha$ 2-3Sia                                                                                                     |
| 8  | SNA    | <i>Sambucus nigra</i>          | Natural     | $\alpha$ 2-6Sia                                                                                                     |
| 9  | SSA    | <i>Sambucus sieboldiana</i>    | Natural     | $\alpha$ 2-6Sia                                                                                                     |
| 10 | TJAI   | <i>Trichosanthes japonica</i>  | Natural     | $\alpha$ 2-6Sia                                                                                                     |
| 11 | PHAL   | <i>Phaseolus vulgaris</i>      | Natural     | GlcNAc $\beta$ 1-6Man (Tetraantenna)                                                                                |
| 12 | ECA    | <i>Erythrina cristagalli</i>   | Natural     | $\beta$ Gal                                                                                                         |
| 13 | RCA120 | <i>Ricinus communis</i>        | Natural     | $\beta$ Gal                                                                                                         |
| 14 | PHAE   | <i>Phaseolus vulgaris</i>      | Natural     | bisecting GlcNAc                                                                                                    |
| 15 | DSA    | <i>Datura stramonium</i>       | Natural     | GlcNAc $\beta$ 1-6Man (Tetraantenna)                                                                                |
| 16 | GSLII  | <i>Griffonia simplicifolia</i> | Natural     | GlcNAc $\beta$ 1-4Man                                                                                               |



|    |         |                                    |         |                                                                                                                    |
|----|---------|------------------------------------|---------|--------------------------------------------------------------------------------------------------------------------|
| 17 | NPA     | <i>Narcissus pseudonarcissus</i>   | Natural | Man $\alpha$ 1-3Man                                                                                                |
| 18 | ConA    | <i>Canavalia ensiformis</i>        | Natural | M3, Man $\alpha$ 1-2Man $\alpha$ 1-3(Man $\alpha$ 1-6)Man, GlcNAc $\beta$ 1-2Man $\alpha$ 1-3(Man $\alpha$ 1-6)Man |
| 19 | GNA     | <i>Galanthus nivalis</i>           | Natural | Man $\alpha$ 1-3Man, Man $\alpha$ 1-6Man                                                                           |
| 20 | HHL     | <i>Hippeastrum hybrid</i>          | Natural | Man $\alpha$ 1-3Man, Man $\alpha$ 1-6Man                                                                           |
| 21 | ACG     | <i>Agrocybe cylindracea</i>        | Natural | $\alpha$ 2-3Sia                                                                                                    |
| 22 | TxLcl   | <i>Tulipa gesneriana</i>           | Natural | Galactosylated N-glycans up to triantenna                                                                          |
| 23 | BPL     | <i>Bauhinia purpurea alba</i>      | Natural | Gal $\beta$ 1-3GlcNAc(GalNAc), $\alpha$ / $\beta$ GalNAc                                                           |
| 24 | TJAI    | <i>Trichosanthes japonica</i>      | Natural | $\alpha$ 1-2Fuc                                                                                                    |
| 25 | EEL     | <i>Euonymus europaeus</i>          | Natural | $\alpha$ Gal (B)                                                                                                   |
| 26 | ABA     | <i>Agaricus bisporus</i>           | Natural | Gal $\beta$ 1-3GalNAc (T), GlcNAc                                                                                  |
| 27 | LEL     | <i>Lycopersicon esculentum</i>     | Natural | Polylactosamine, (GlcNAc) <sub>n</sub>                                                                             |
| 28 | STL     | <i>Solanum tuberosum</i>           | Natural | Polylactosamine, (GlcNAc) <sub>n</sub>                                                                             |
| 29 | UDA     | <i>Urtica dioica</i>               | Natural | (GlcNAc) <sub>n</sub>                                                                                              |
| 30 | PWM     | <i>Phytolacca americana</i>        | Natural | (GlcNAc) <sub>n</sub>                                                                                              |
| 31 | Jacalin | <i>Artocarpus integrifolia</i>     | Natural | Gal $\beta$ 1-3GalNAc (T), GalNAc $\alpha$ (Tn)                                                                    |
| 32 | PNA     | <i>Arachis hypogaea</i>            | Natural | Gal $\beta$ 1-3GalNAc (T)                                                                                          |
| 33 | WFA     | <i>Wisteria floribunda</i>         | Natural | Terminal GalNAc, LacDiNAc                                                                                          |
| 34 | ACA     | <i>Amaranthus caudatus</i>         | Natural | Gal $\beta$ 1-3GalNAc (T)                                                                                          |
| 35 | MPA     | <i>Maclura pomifera</i>            | Natural | Gal $\beta$ 1-3GalNAc (T), GalNAc $\alpha$ (Tn)                                                                    |
| 36 | HPA     | <i>Helix pomatia</i>               | Natural | $\alpha$ GalNAc (A, Tn)                                                                                            |
| 37 | VVA     | <i>Vicia villosa</i>               | Natural | $\alpha$ , $\beta$ GalNAc (A, Tn, LacDiNAc)                                                                        |
| 38 | DBA     | <i>Dolichos biflorus</i>           | Natural | $\alpha$ , $\beta$ GalNAc (A, Tn, LacDiNAc)                                                                        |
| 39 | SBA     | <i>Glycine max</i>                 | Natural | $\alpha$ , $\beta$ GalNAc (A, Tn, LacDiNAc)                                                                        |
| 40 | Calsepa | <i>Calystegia sepium</i>           | Natural | Biantenna with bisecting GlcNAc                                                                                    |
| 41 | PTL I   | <i>Psophocarpus tetragonolobus</i> | Natural | $\alpha$ GalNAc (A, Tn)                                                                                            |
| 42 | MAH     | <i>Maackia amurensis</i>           | Natural | $\alpha$ 2-3Sia                                                                                                    |
| 43 | WGA     | <i>Triticum vulgare</i>            | Natural | (GlcNAc) <sub>n</sub> , polySia                                                                                    |
| 44 | GSLIA4  | <i>Griffonia simplicifolia</i>     | Natural | $\alpha$ GalNAc (A, Tn)                                                                                            |
| 45 | GSLIB4  | <i>Griffonia simplicifolia</i>     | Natural | $\alpha$ Gal (B)                                                                                                   |

Abbreviations: Gal (D-galactose), GalNAc (N-acetyl-galactosamine), GlcNAc (N-acetyl-glucosamine), Fuc (L-fucose), Glc (D-glucose), Sia (Sialic acid), LacNAc (N-acetyl-lactosamine). <sup>2</sup>Specificity data were obtained by frontal affinity chromatography and glycoconjugate microarray.
